# Supplementary material for: Almost complete dissolution of woody biomass with tetra-n-butylphosphonium hydroxide aqueous solution at 60 °C
Source: Royal Society of Chemistry journal article supplement (doi:10.1039/c5gc00646e), 2015-01-01
Supplement: c5gc00646e1.pdf [file c5gc00646e1.pdf]

Electronic Supplementary Information

**Almost complete dissolution of woody biomass with tetra-*n*-butylphosphonium  
hydroxide aqueous solution at 60 °C**

**Mitsuru Abe,<sup>a,b</sup> Sachiko Yamanaka,<sup>a,b</sup> Hajime Yamada<sup>c</sup>, Tatsuhiko Yamada<sup>c</sup> and Hiroyuki Ohno<sup>\*a,b</sup>**

<sup>a</sup> Department of Biotechnology, Tokyo University of Agriculture and Technology, Naka-cho, 2-24-16, Koganei, Tokyo 184-8588, Japan. Fax: +81-42-388-7024; Tel: +81-42-388-7024; E-mail: ohnoh@cc.tuat.ac.jp

<sup>b</sup> Functional Ionic Liquids Laboratories, Graduate School of Engineering, Naka-cho, 2-24-16, Koganei, Tokyo 184-8588, Japan. Fax: +81-42-388-7024; Tel: +81-42-388-7024; E-mail: ohnoh@cc.tuat.ac.jp

<sup>c</sup> Department of Biomass Chemistry, Forestry and Forest Products Research Institute, Matsunosato 1, Tsukuba, Ibaraki 305-8687, Japan. Fax: +81-29-874-3720; Tel: +81-29-829-8348; E-mail: yamadat@affrc.go.jp

**Water content of woods**

The water content of each wood powder was measured with thermogravimetric analysis (TGA). The TGA measurements were performed using a SEIKO TG/DTA 220 instrument with a heating rate of 10 °C min<sup>-1</sup> from 25 to 110 °C, and retain at 110 °C for 20 min under nitrogen gas.

Table S1. Water content of woody biomass used in this study.

| Woody biomass | Water content (wt%) |
|---------------|---------------------|
| Oak           | 2.9                 |
| Eukalyptus    | 4.3                 |
| Cedar         | 5.9                 |
| Pine          | 5.3                 |
| Spruce        | 5.6                 |
| Ginkgo        | 4.6                 |

**Appearance of [P<sub>4,4,4,4</sub>]OH aq. solution/wood mixtures**

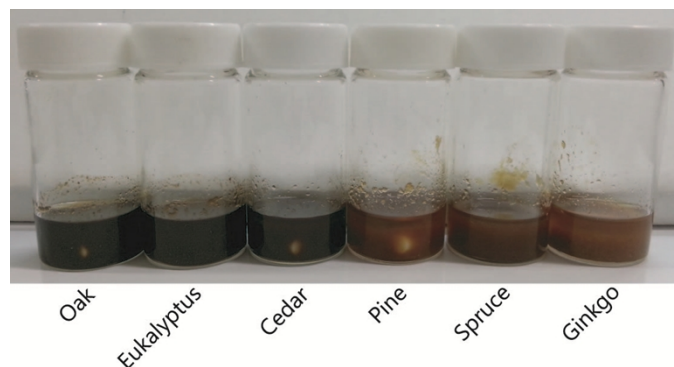

Figure S1. Appearance of 50% [P<sub>4,4,4,4</sub>]OH aq. solution/wood mixtures (5 wt% wood) after 1 h stirring without heating (at 25 °C).  
White things in some vials are magnetic stirring bars.

### Correlation between dissolution degree of woods and their components

Amounts of holocellulose and  $\alpha$ -cellulose were decided with reference to a paper which was written by Pettersen *et al.* Lignin contents were determined with sulfuric acid method published by Ritter *et al.* in 1932. Sum amount of  $\beta$ - and  $\gamma$ -cellulose (g) was determined by following equation.

$$[\beta\text{-Cellulose}] + [\gamma\text{-Cellulose}] = \text{Holocellulose} - [\alpha\text{-Cellulose}] \quad (\text{Eq.})$$

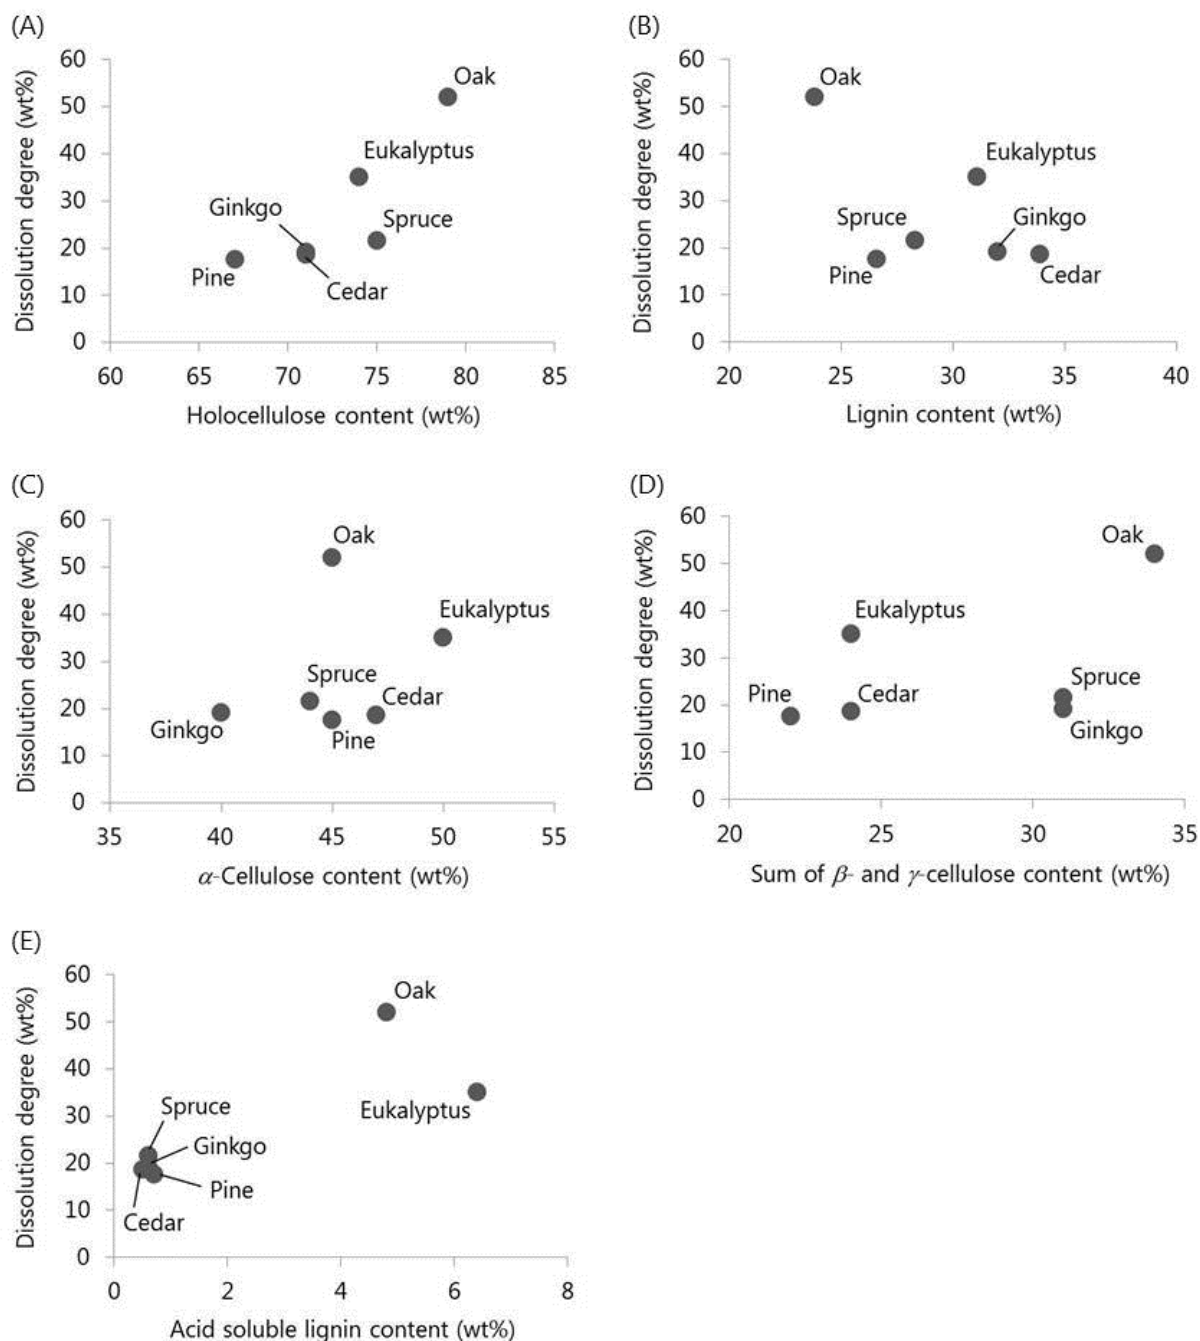

Figure S2. Correlation between dissolution degree of woods and their components, (A) holocellulose, (B) lignin, (C)  $\alpha$ -cellulose, (D) sum of  $\beta$ - and  $\gamma$ -cellulose, and (E) acid soluble lignin.

## **Reference**

1. R. C. Pettersen, in *The Chemistry of Solid Wood*, ed. R. M. Rowell, ACS Publications, Washington, DC, 1984, vol. 207, pp. 57-126.
2. G. J. Ritter, R. M. Seborg and R. L. Mitchell, *Ind. Eng. Chem. Anal. Ed.*, 1932, **4**, 202-204.
